# Supplementary material
Source: PubMed Central journal article supplement (PMC11000276)
Supplement: NIHMS1982359-supplement-Appendix_A__Supplementary_data.pdf [file NIHMS1982359-supplement-Appendix_A__Supplementary_data.pdf]

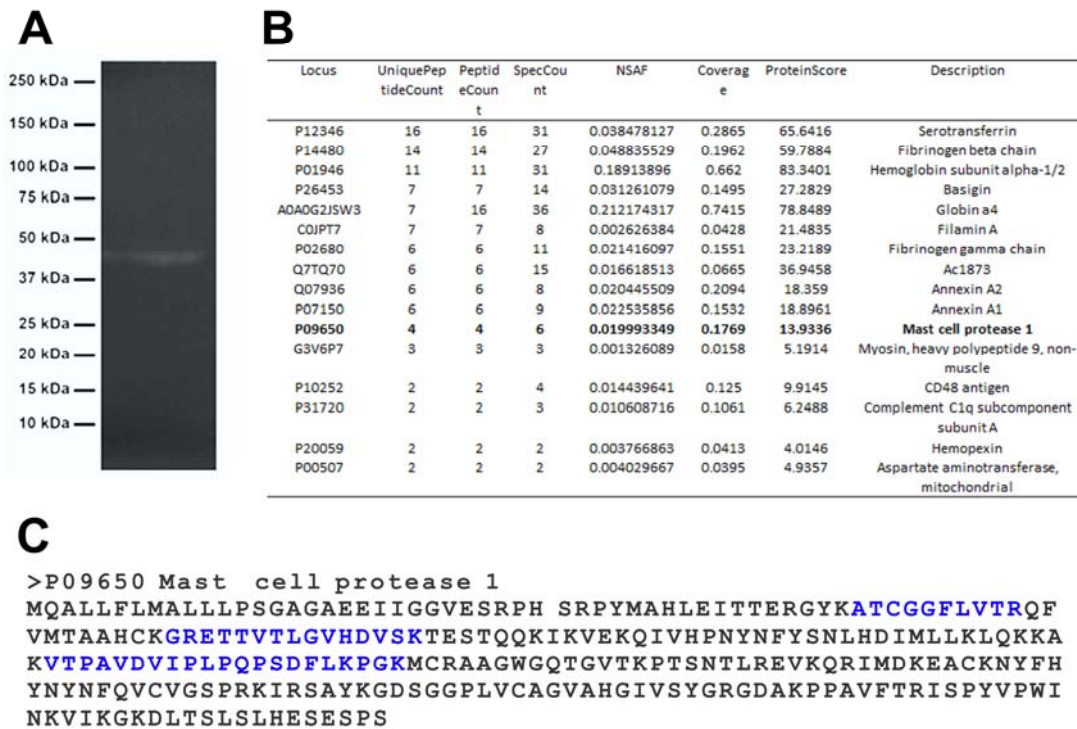

1

2 **Supplementary Fig. S1.** Native rat mast cell protease 1 (rMCP-1) is the main chymotrypsin-like

3 protease in peritoneum-derived cell extract. (A) Zymography was performed using 12% SDS-

4 PAGE containing 0.1% casein. Gel was loaded with the protein extract containing chymotrypsin-

5 like activity isolated from peritoneum-derived mast cells. (B) Protein extract containing

6 chymotrypsin-like activity isolated from peritoneum-derived mast cells was separated by 12%

7 SDS-PAGE following by Coomassie Blue staining. Band spot representing proteolytic activity

8 on zymography was excised and subjected to trypsin digestion followed by LC-MS/MS analysis.

9 (C) rMCP-1 sequence, highlighted peptides were identified by LC-MS/MS in the gel band with

10 proteolytic activity (4 unique to rMCP-1 with 17% coverage).

11

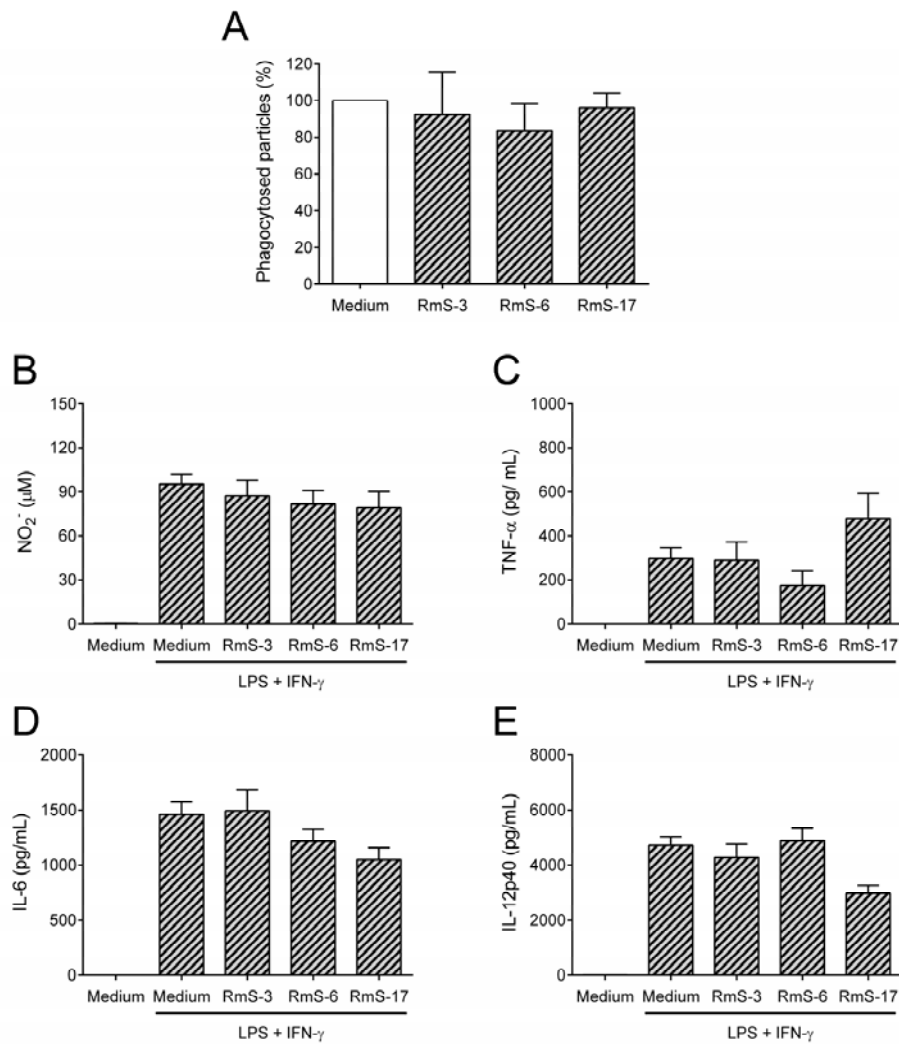

12

13 **Supplementary Fig. S2.** *Rhipicephalus microplus* serpins do not affect phagocytosis or the  
 14 production of inflammatory mediators by murine macrophages. For the phagocytosis assay, cells  
 15 were incubated with medium only or in presence of each serpin (500 nM) followed by zymosan  
 16 particles opsonized with mouse serum. Phagocytosis was evaluated by light microscopy and the  
 17 percentage of phagocytosis was determined by the number of macrophages that had three or  
 18 more zymosan particles in each 100 cells (A). For the production of inflammatory mediators,  
 19 cells were preincubated with medium only or with each serpin (1000 nM each) for 1 h and  
 20 stimulated or not with LPS plus IFN- $\gamma$  (final concentration: 10 ng/ml of each). Cell culture  
 21 supernatants were collected NO determination by Griess reaction (B), and TNF-  $\alpha$  (C), IL-6 (D)  
 22 and IL-12p40 (E) determination by ELISA.
